# Supplementary material for: Structure-PPi: a module for the annotation of cancer-related single-nucleotide variants at protein–protein interfaces
Source: PubMed Central journal article supplement (PMC4495296; doi:10.1093/bioinformatics/btv142), 2015-03-11
Supplement: supp_btv142_manuscript-Vazquez_et_al_2014_suppl_R3.pdf [file supp_btv142_manuscript-Vazquez_et_al_2014_suppl_R3.pdf]

## Supplementary Information

### Structure-PPi: a module for the annotation of cancer-related single-nucleotide variants at protein-protein interfaces.

Miguel Vazquez, Alfonso Valencia, and Tirso Pons

Structural Biology and BioComputing Programme. Spanish National Cancer Research Centre (CNIO), 28029 Madrid.

**Table S1.** Comparison of the Structure-PPi module with similar available tools.

|                                                    | <b>Rbbt-Structure</b>                                                                                       | <b>MuPIT interactive</b>              | <b>LS-SNP/PDB</b>                                                                                     | <b>MutDB</b>                                                                                                     | <b>SNPs3D</b>                                                  | <b>LS-SNP</b>                                                                                     | <b>MutationAssessor</b>                                                           | <b>Polyphen-2</b>                                          |
|----------------------------------------------------|-------------------------------------------------------------------------------------------------------------|---------------------------------------|-------------------------------------------------------------------------------------------------------|------------------------------------------------------------------------------------------------------------------|----------------------------------------------------------------|---------------------------------------------------------------------------------------------------|-----------------------------------------------------------------------------------|------------------------------------------------------------|
| Website URL                                        | structureppi.bioinfo.cnio.es                                                                                | mupit.icm.jhu.edu                     | ls-snp.icm.jhu.edu/ls-snp-pdb                                                                         | mutdb.org                                                                                                        | snps3d.org                                                     | modbase.compbio.ucsf.edu/LS-SNP                                                                   | mutationassessor.org                                                              | genetics.bwh.harvard.edu/pph2                              |
| Status (Last Update)                               | (21-Nov-2014)                                                                                               | (xx-yyy-2013)                         | (xx-yyy-2012)                                                                                         | (06-Feb-2007)                                                                                                    | (29-Oct-2008)                                                  | (21-Jun-2006)                                                                                     | (12-Sep-2012)                                                                     | (08-Mar-2012)                                              |
| Custom input? (single or batch query)              | Yes. Accepts user genomic or protein coordinates                                                            | Yes. Accepts user genomic coordinates | Yes. Accepts user gene name, genomic coordinates, and identifiers from dbSNP, UniProtKB, KEGG and PDB | Yes. Accepts user gene or protein names, and identifiers from dbSNP and UniProtKB/Swiss-Prot variants (humsavar) | Yes. Accepts user dbSNP or RefSeq identifiers                  | Yes. Accepts user gene name, genomic coordinates, and identifiers from dbSNP, UniProtKB, and KEGG | Yes. Accepts user genomic or protein coordinates                                  | Yes. Accepts user genomic or protein coordinates           |
| Batch entry of variants                            | Yes (high-throughput)                                                                                       | Yes (high-throughput)                 | Yes                                                                                                   | No                                                                                                               | Yes                                                            | Yes                                                                                               | Yes (high-throughput)                                                             | Yes (high-throughput)                                      |
| Interface                                          | Browser-based, REST web service, and command-line                                                           | Browser-based                         | Browser-based                                                                                         | Browser-based                                                                                                    | Browser-based                                                  | Browser-based                                                                                     | Browser-based                                                                     | Browser-based                                              |
| 3D repository                                      | PDB and Interactome3D                                                                                       | PDB                                   | PDB                                                                                                   | PDB                                                                                                              | PDB                                                            | PDB+ 3D models <sup>(1)</sup>                                                                     | PDB                                                                               | PDB                                                        |
| Proximity to known functional residues considered? | Yes                                                                                                         | Yes                                   | Yes                                                                                                   | No                                                                                                               | No                                                             | Yes                                                                                               | Yes                                                                               | Yes                                                        |
| User-parametrizable distance?                      | Yes                                                                                                         | No                                    | No                                                                                                    | No                                                                                                               | No                                                             | No                                                                                                | No                                                                                | Yes                                                        |
| Annotation sources                                 | UniProtKB/Swiss-Prot <sup>e</sup> , APPRIS, Firestar, InterPro <sup>f</sup> , COSMIC, dbNSFP, Interactome3D | UniProtKB/Swiss-Prot <sup>e</sup>     | DSSP <sup>a</sup> , DELPHI <sup>b</sup> , KEGG, PDB                                                   | UniProtKB/Swiss-Prot <sup>e</sup> , dbSNP, PDB,                                                                  | PDB, dbSNP, OMIM, HGMD, KEGG, GO, UniProtKB/Swiss-Prot, PubMed | PDB, dbSNP, KEGG, PIBASE                                                                          | UniProtKB/Swiss-Prot <sup>e</sup> , COSMIC, Pfam <sup>f</sup> , PDB, Piana, dbSNP | UniProtKB/Swiss-Prot <sup>e</sup> , PDB, DSSP <sup>a</sup> |
| Download results option                            | Yes                                                                                                         | No                                    | No                                                                                                    | No                                                                                                               | Limited to Rasmol                                              | Limited to Rasmol                                                                                 | Yes                                                                               | Limited to WHES                                            |
| Quick access to pre-computed datasets              | Yes                                                                                                         | No                                    | No                                                                                                    | Yes                                                                                                              | Yes                                                            | Yes                                                                                               | No                                                                                | Yes (WHES)                                                 |

<sup>a</sup>Solvent accessibility, <sup>b</sup>Electrostatic surface potential, <sup>d</sup>, <sup>e</sup>Feature table section, <sup>f</sup>Protein domains, <sup>g</sup>WHES: whole human exome sequence space dataset, <sup>(1)</sup>3D models of single proteins but not protein-complexes, Piana: Protein-protein interaction database.

**Table S2.** List of functionalities implemented in the Structure-PPi module.

| <b>Tasks</b>                   | <b>Description</b>                                                                                                                                                                                        |
|--------------------------------|-----------------------------------------------------------------------------------------------------------------------------------------------------------------------------------------------------------|
| ANNOTATE                       | Annotates genomic mutations based on the protein features that are overlapping amino-acid changes.                                                                                                        |
| ANNOTATE MI                    | Annotates mutated isoforms based on the protein features that are overlapping amino-acid changes.                                                                                                         |
| ANNOTATE NEIGHBOURS            | Annotates genomic mutations based on the protein features that are in close physical proximity to amino-acid changes.                                                                                     |
| ANNOTATE MI NEIGHBOURS         | Annotates mutated isoforms based on the protein features that are in close physical proximity to amino-acid changes.                                                                                      |
| INTERFACES                     | Find variants that affect residues in protein-protein interaction interfaces. It uses the PDB files of protein-protein complexes annotated in the Interactome3d database (release 2014_1).                |
| MI INTERFACES                  | Find mutated isoforms with affected residues in protein-protein interaction interfaces.                                                                                                                   |
| MI NEIGHBOURS                  | Find residues within physical proximity to amino-acid changes in mutated isoforms.                                                                                                                        |
| NEIGHBOUR_MAP                  | For a given PDB file, find all pairs of residues that fall within a given 'distance of each other. It uses the PDB files of individual proteins annotated in the Interactome3d database (release 2014_1). |
| NEIGHBOURS_IN_PDB              | Use a PDB file to find the residues neighbouring, in three-dimensional space, a particular residue in a given sequence.                                                                                   |
| PDB_ALIGNMENT_MAP              | Find the correspondence between sequence positions in a PDB file and in a given sequence. The PDB positions are reported as 'chain:position'.                                                             |
| PDB_CHAIN_POSITION_IN_SEQUENCE | Translate the positions of amino acids in a particular chain of the provided PDB file into positions inside a given sequence.                                                                             |
| SEQUENCE_POSITION_IN_PDB       | Translate the positions inside a given amino-acid sequence to positions in the sequence of a PDB file by aligning them.                                                                                   |
| Wizard                         | Retrieve all annotations, including neighbors and interfaces, by using genomic mutation, mutated isoform, or an identifier such as associated gene name or gene symbol.                                   |

We illustrate the performance and usefulness of the Structure-PPi module by applying this tool to a validation set of mutations (14 pathogenic and 10 neutral) defined in Lee et al., 2010. Mutations included in the validation set (Table 1 and Supplementary Table S1 in Lee et al., 2010) were classified by genetic or integrative methods that used a combination of data from different sources: co-occurrence with known deleterious mutations, personal and family history of patients carrying the variant, and co-segregation of the variant with disease within pedigrees. As you can see below, Structure-PPi achieves a level of performance similar to that obtained by MetaSVM, a support vector machine algorithm, which incorporate results from state-of-the-art methods (e.g., SIFT, PolyPhen-2, MutationTaster, Mutation Assessor, FATHMM, and LRT) and the maximum frequency observed in the 1000G project (for details see dbNSFP v2.8 database at <https://sites.google.com/site/jpopgen/dbNSFP>). In addition, Table S3 shows the utility of Structure-PPi for providing complementary information to the prediction methods. Indeed, this complementary information facilitates discrimination of false positive results (bold letters in the column MetaSVM), and also identifies mutations that should be study in more details (bold letters in the column StructurePPi).

For the purpose of comparison, we assume that the Structure-PPi annotations support a "(D)eleterious" prediction in the following two scenarios: *i*) "mutations in protein-protein interfaces" AND "mutation position" OR "its neighboring residues" accommodate variants in human diseases, and *ii*) "mutations outside protein-protein interfaces" AND "mutation position" AND "its neighboring residues" accommodate variants in human diseases. Otherwise, Structure-PPi suggests a careful experimental study of the mutations.

Despite the goal of Structure-PPi is to annotate mutations instead to predict damage, based on the previous assumptions we calculated the Accuracy, Recall (or Sensitivity), Precision, and Matthews Correlation Coefficient (MCC). Hereafter, we will refer to the following abbreviations: True positives (TP), correctly predicted disease-associated mutations. False positives (FP), neutral mutations predicted as disease ones. True negatives (TN), correctly predicted neutral mutations. False negatives (FN), disease-associated mutations predicted as neutral. Accuracy accounts for the fraction of mutations correctly predicted in function of the total number of mutations. Recall, also referred to as sensitivity by other authors, accounts for the proportion of correctly predicted disease-associated mutations in function of all the disease-associated mutations in the dataset. Precision accounts for the proportion of correctly predicted disease-associated mutations with respect to all the predicted disease-associated mutations. The Accuracy, Recall, Precision, and MCC were calculated according to the following formulas:

$$\text{Accuracy} = \frac{TP + TN}{TP + FP + TN + FN} ; \text{Precision} = \frac{TP}{TP + FP}$$

$$\text{Recall} = \frac{TP}{TP + FN} ; \text{MCC} = \frac{TP \cdot TN - FP \cdot FN}{\sqrt{(TP + FP)(TP + FN)(TN + FP)(TN + FN)}}$$

The results are as follow: MetaSVM (Accuracy: 0.83, Recall: 1.00, Precision: 0.78, MCC: 0.68) and Structure-PPi (Accuracy: 0.88, Recall: 0.79, Precision: 1.00, MCC: 0.78). This assessment reveals that Structure-PPi shows a better precision than MetaSVM, and also a good agreement between predictions and observations.

**Table S3.** Structure-PPi report of validated variants in BRCA1 BRCT domains.

| Pathogenic     | UniProt Features (position)                                                                                  | UniProt Features (neighbors)                                                                                                                                              | PPi | MetaSVM        | StructurePPi |
|----------------|--------------------------------------------------------------------------------------------------------------|---------------------------------------------------------------------------------------------------------------------------------------------------------------------------|-----|----------------|--------------|
| T1685I         | DOMAIN(BRCT1 - 1642:1736); VAR_063902(T->A) <sup>a</sup> ; VAR_063903(T->I) <sup>b</sup>                     | M1652I (polymorphism)                                                                                                                                                     | no  | 0.76(D)        | <b>(T)</b> * |
| T1685A         | DOMAIN(BRCT1 - 1642:1736); VAR_063902(T->A) <sup>a</sup> ; VAR_063903(T->I) <sup>b</sup>                     | M1652I (polymorphism)                                                                                                                                                     | no  | 0.73(D)        | <b>(T)</b> * |
| M1689R         | DOMAIN(BRCT1 - 1642:1736); VAR_063904(M->R) <sup>a</sup> ; STRAND(1686:1689)                                 | S1655A, K1702M (abolishes interaction with BRIP1); C1697R (ovarian cancer); S1715R, K1690Q (breast cancer); V1713G (polymorphism)                                         | yes | 0.26(D)        | (D)          |
| R1699W         | DOMAIN(BRCT1 - 1642:1736); VAR_020703(R->W) <sup>c</sup>                                                     | C1697R (ovarian cancer)                                                                                                                                                   | yes | 0.93(D)        | (D)          |
| G1706E         | DOMAIN(BRCT1 - 1642:1736); VAR_063905(G->E) <sup>a</sup> ; HELIX(1701:1708)                                  | A1708E (abolishes ACACA binding in breast cancer); V1713G (polymorphism); K1702M (abolishes interaction with BRIP1)                                                       | no  | 0.80(D)        | (D)          |
| A1708E         | DOMAIN(BRCT1 - 1642:1736); VAR_007796(A->E) <sup>d</sup> ; HELIX(1701:1708)                                  | L1786P (breast & ovarian cancer; G1706E (breast cancer))                                                                                                                  | no  | 0.85(D)        | (D)          |
| S1715R         | DOMAIN(BRCT1 - 1642:1736); VAR_063906(S->R) <sup>a</sup> ; STRAND(1712:1715)                                 | M1689R (breast cancer); D1692N (ovarian cancer); V1713G (polymorphism)                                                                                                    | no  | 0.37(D)        | (D)          |
| G1738R         | VAR_063907(G->R) <sup>a</sup> ; MUTAGEN(G->E, abolishes interaction with BRIP1)                              | C1697R (ovarian cancer)                                                                                                                                                   | yes | 0.71(D)        | (D)          |
| L1764P         | DOMAIN(BRCT2 - 1756:1855); VAR_063908(L->P) <sup>a</sup>                                                     | I1766S, G1788V (breast cancer)                                                                                                                                            | yes | 0.63(D)        | (D)          |
| I1766S         | DOMAIN(BRCT2 - 1756:1855); VAR_063909(I->S) <sup>a</sup> ; STRAND(1765:1768)                                 | L1764P (breast cancer)                                                                                                                                                    | no  | 0.73(D)        | (D)          |
| M1775R         | DOMAIN(BRCT2 - 1756:1855); VAR_063212(M->K) <sup>e</sup> ; VAR_007799(M->R) <sup>f</sup> ; STRAND(1773:1775) | P1776S (ovarian cancer)                                                                                                                                                   | yes | 0.69(D)        | (D)          |
| M1775K         | DOMAIN(BRCT2 - 1756:1855); VAR_063212(M->K) <sup>e</sup> ; VAR_007799(M->R) <sup>f</sup> ; STRAND(1773:1775) | P1776S (ovarian cancer)                                                                                                                                                   | yes | 0.69(D)        | (D)          |
| G1788V         | DOMAIN(BRCT2 - 1756:1855); VAR_063212(G->V) <sup>a</sup>                                                     | L1764P (breast cancer); L1786P (breast & ovarian cancer)                                                                                                                  | no  | 1.07(D)        | (D)          |
| V1838E         | DOMAIN(BRCT2 - 1756:1855); HELIX(1835:1844)                                                                  | -                                                                                                                                                                         | yes | 0.86(D)        | <b>(T)</b>   |
| <b>Neutral</b> |                                                                                                              |                                                                                                                                                                           |     |                |              |
| M1652I         | DOMAIN(BRCT1 - 1642:1736); VAR_007795(M->I) <sup>g</sup> ; STRAND(1651:1656)                                 | V1665M (polymorphism)                                                                                                                                                     | yes | -0.85(T)       | (T)*         |
| M1652T         | DOMAIN(BRCT1 - 1642:1736); VAR_007795(M->I) <sup>g</sup> ; STRAND(1651:1656)                                 | V1665M (polymorphism)                                                                                                                                                     | yes | -0.05(T)       | (T)*         |
| F1662S         | DOMAIN(BRCT1 - 1642:1736); HELIX(1659:1672); VAR_052080(F->C) <sup>h</sup>                                   | V1665M (polymorphism)                                                                                                                                                     | yes | -0.81(T)       | (T)*         |
| A1669S         | DOMAIN(BRCT1 - 1642:1736); HELIX(1659:1672)                                                                  | M1652I, V1665M (polymorphism)                                                                                                                                             | yes | <b>0.35(D)</b> | (T)*         |
| E1682K         | DOMAIN(BRCT1 - 1642:1736)                                                                                    | -                                                                                                                                                                         | yes | <b>0.73(D)</b> | (T)          |
| T1720A         | DOMAIN(BRCT1 - 1642:1736); HELIX(1717:1724); T->A (No effect on in vitro phosphorylation)                    | -                                                                                                                                                                         | no  | -0.50(T)       | (T)          |
| V1736A         | DOMAIN(BRCT1 - 1642:1736)                                                                                    | G1738R, M1689R, S1715R (breast cancer); C1697R, P1749R (ovarian cancer); G1738E (abolishes interaction with BRIP1); V1713G (polymorphism); P1749R (reduces BRIP1 binding) | no  | <b>0.85(D)</b> | (T)          |
| R1751Q         | HELIX(1748:1753)                                                                                             | P1749R (ovarian cancer & reduces BRIP1 binding); S1755A (No effect on in vitro phosphorylation)                                                                           | no  | <b>0.60(D)</b> | (T)          |
| V1804D         | DOMAIN(BRCT2 - 1756:1855)                                                                                    | -                                                                                                                                                                         | no  | -0.83(T)       | (T)          |
| P1859R         | -                                                                                                            | -                                                                                                                                                                         | no  | -0.41(T)       | (T)          |

PPI: indicates mutations localized in a Protein-Protein interface (yes) or outside the interface (no); MetaSVM: score and predictions in parenthesis, extracted from dbNSFP database (<https://sites.google.com/site/jpopgen/dbNSFP>); StructurePPI: supporting annotations for mutations classified as "(D)eleterious" or "(T)olerated" (see details in the text); <sup>a</sup>Unknown pathological significance in Breast cancer. <sup>b</sup>Could be associated with cancer susceptibility; multifactorial likelihood analysis provides evidence for pathogenicity. <sup>c</sup>Observed in ovarian cancer. <sup>d</sup>Abolishes ACACA binding in Breast cancer. <sup>e</sup>Strongly reduced transcription transactivation; abolishes interaction with BRIP1 and RBBP8 in Breast cancer. <sup>f</sup>Alters protein stability and abolishes ACACA and BRIP1 binding in Breast cancer. <sup>g</sup>Rare polymorphism (dbSNP:rs1799967). <sup>h</sup>Polymorphism (dbSNP:rs28897695). \*Note that variants M1652I, M1652T, and F1662S, that have been included as neutral in the validation data set of Lee et al. (2010), are variants with an uncertain clinical significance according to updated annotations in databases (i.e. increased risk of ovarian cancer). In addition, these variants affect protein-protein interfaces. The new annotations in databases are in agreement with the Structure-PPI feature score available on the website in the section "Damage predictions". The Structure-PPI feature score considers mutations in protein-protein interaction surfaces, COSMIC samples with mutations over the same residue, UniProt variants and their potential association with disease, and UniProt features critical for protein function and having a prevalence in COSMIC that is more than double than that in 1000 Genomes Project: MUTAGEN, DISULFID, DNA\_BIND, METAL, INTRAMEM, CROSSLNK.

Table S4. General description of coding nsSNVs in COSMIC and 1000 Genomes Project.

| COSMIC<br>Features   | not_PPi       |       | PPi          |       | COSMIC<br>%PPi/%not_PPi | 1000G<br>Features    | not_PPi       |       | PPi         |       | 1000G<br>%PPi/%not_PPi |
|----------------------|---------------|-------|--------------|-------|-------------------------|----------------------|---------------|-------|-------------|-------|------------------------|
|                      | Freq          | %     | Freq         | %     |                         |                      | Freq          | %     | Freq        | %     |                        |
| BINDING              | 369           | 0.05  | 54           | 0.35  | 6.54                    | BINDING              | 70            | 0.03  | 6           | 0.17  | 6.21                   |
| CA_BIND              | 406           | 0.06  | 41           | 0.27  | 4.51                    | CA_BIND              | 101           | 0.04  | 21          | 0.61  | 15.06                  |
| METAL                | 360           | 0.05  | 59           | 0.39  | 7.32                    | METAL                | 52            | 0.02  | 4           | 0.12  | 5.57                   |
| NP_BIND              | 1766          | 0.26  | 245          | 1.60  | 6.20                    | NP_BIND              | 369           | 0.15  | 33          | 0.95  | 6.48                   |
| DNA_BIND             | 3883          | 0.57  | 537          | 3.51  | 6.18                    | DNA_BIND             | 446           | 0.18  | 14          | 0.40  | 2.27                   |
| MUTAGEN              | 1195          | 0.17  | 239          | 1.56  | 8.93                    | MUTAGEN              | 231           | 0.09  | 25          | 0.72  | 7.84                   |
| SITE                 | 183           | 0.03  | 30           | 0.20  | 7.32                    | SITE                 | 38            | 0.02  | 5           | 0.14  | 9.53                   |
| ACT_SITE             | 199           | 0.03  | 16           | 0.10  | 3.59                    | ACT_SITE             | 26            | 0.01  | 4           | 0.12  | 11.14                  |
| Firestar_Cat         | 342           | 0.05  | 51           | 0.33  | 6.66                    | Firestar_Cat         | 69            | 0.03  | 2           | 0.06  | 2.10                   |
| Firestar_Bind        | 10083         | 1.48  | 699          | 4.57  | 3.10                    | Firestar_Bind        | 2146          | 0.85  | 88          | 2.54  | 2.97                   |
| MOD_RES              | 1606          | 0.24  | 147          | 0.96  | 4.09                    | MOD_RES              | 440           | 0.18  | 9           | 0.26  | 1.48                   |
| CARBOHYD             | 718           | 0.11  | 11           | 0.07  | 0.68                    | CARBOHYD             | 356           | 0.14  | 4           | 0.12  | 0.81                   |
| LIPID                | 44            | 0.01  | 3            | 0.02  | 3.04                    | LIPID                | 11            | 0.00  | 0           | -     | -                      |
| CROSSLNK             | 45            | 0.01  | 18           | 0.12  | 17.86                   | CROSSLNK             | 13            | 0.01  | 1           | 0.03  | 5.57                   |
| DISULFID             | 1422          | 0.21  | 71           | 0.46  | 2.23                    | DISULFID             | 240           | 0.10  | 11          | 0.32  | 3.32                   |
| VARIANT              | 9137          | 1.34  | 1091         | 7.13  | 5.33                    | VARIANT              | 23153         | 9.21  | 392         | 11.30 | 1.23                   |
| HELIX                | 22072         | 3.23  | 4794         | 31.33 | 9.70                    | HELIX                | 6305          | 2.51  | 1115        | 32.13 | 12.81                  |
| STRAND               | 15561         | 2.28  | 2834         | 18.52 | 8.13                    | STRAND               | 4517          | 1.80  | 626         | 18.04 | 10.04                  |
| TURN                 | 2298          | 0.34  | 545          | 3.56  | 10.59                   | TURN                 | 651           | 0.26  | 96          | 2.77  | 10.68                  |
| DOMAIN               | 121962        | 17.85 | 5135         | 33.56 | 1.88                    | DOMAIN               | 36195         | 14.40 | 965         | 27.81 | 1.93                   |
| TOPO_DOM             | 124880        | 18.27 | 2125         | 13.89 | 0.76                    | TOPO_DOM             | 40217         | 16.00 | 473         | 13.63 | 0.85                   |
| MOTIF                | 1291          | 0.19  | 198          | 1.29  | 6.85                    | MOTIF                | 359           | 0.14  | 15          | 0.43  | 3.03                   |
| REPEAT               | 28507         | 4.17  | 689          | 4.50  | 1.08                    | REPEAT               | 9297          | 3.70  | 156         | 4.50  | 1.22                   |
| ZN_FING              | 14079         | 2.06  | 153          | 1.00  | 0.49                    | ZN_FING              | 3778          | 1.50  | 26          | 0.75  | 0.50                   |
| COILED               | 15873         | 2.32  | 219          | 1.43  | 0.62                    | COILED               | 6437          | 2.56  | 64          | 1.84  | 0.72                   |
| COMPBIAS             | 20669         | 3.02  | 86           | 0.56  | 0.19                    | COMPBIAS             | 8294          | 3.30  | 11          | 0.32  | 0.10                   |
| INTRAMEM             | 274           | 0.04  | 12           | 0.08  | 1.96                    | INTRAMEM             | 39            | 0.02  | 2           | 0.06  | 3.71                   |
| TRANSMEM             | 28979         | 4.24  | 118          | 0.77  | 0.18                    | TRANSMEM             | 9465          | 3.77  | 46          | 1.33  | 0.35                   |
| Appris_Membr         | 1298          | 0.19  | 0            | -     | -                       | Appris_Membr         | 391           | 0.16  | 1           | 0.03  | 0.19                   |
| INIT_MET             | 96            | 0.01  | 2            | 0.01  | 0.93                    | INIT_MET             | 36            | 0.01  | 0           | -     | -                      |
| NON_TER              | 1             | 0.00  | 0            | -     | -                       | NON_TER              | 0             | -     | 0           | -     | -                      |
| SIGNAL               | 3668          | 0.54  | 1            | 0.01  | 0.01                    | SIGNAL               | 1837          | 0.73  | 0           | -     | -                      |
| Appris_Signal        | 2477          | 0.36  | 3            | 0.02  | 0.05                    | Appris_Signal        | 1272          | 0.51  | 2           | 0.06  | 0.11                   |
| PROPEP               | 3508          | 0.51  | 20           | 0.13  | 0.25                    | PROPEP               | 1308          | 0.52  | 8           | 0.23  | 0.44                   |
| TRANSIT              | 601           | 0.09  | 4            | 0.03  | 0.30                    | TRANSIT              | 472           | 0.19  | 0           | -     | -                      |
| PEPTIDE              | 474           | 0.07  | 46           | 0.30  | 4.33                    | PEPTIDE              | 209           | 0.08  | 18          | 0.52  | 6.24                   |
| REGION               | 46921         | 6.87  | 2343         | 15.31 | 2.23                    | REGION               | 16768         | 6.67  | 500         | 14.41 | 2.16                   |
| <b>Tot_mutations</b> | <b>683396</b> |       | <b>15303</b> |       |                         | <b>Tot_mutations</b> | <b>251297</b> |       | <b>3470</b> |       |                        |

Features: UniProt key names in the "Feature Table" line; Freq: number of nsSNV in a feature; %: percentage of nsSNV in a feature respect to the total number of nsSNV in the dataset; %PPi/%not\_PPi: indicates how frequent is a feature at protein-protein interfaces or outside them; not\_PPi: nsSNV outside protein-protein interfaces; PPi: nsSNV in protein-protein interfaces; Tot\_mutations: total number of nsSNV in the dataset; Firestar\_Cat: Catalytic site residues ("Cat\_Site\_At1") predicted by Firestar; Firestar\_Bind: Binding site residues predicted by Firestar; Appris\_Membr: a "Damaged" transmembrane helix predicted by the THUMP method implemented in Appris; Appris\_Signal: a "Signal peptide" region predicted by the CRASH method implemented in Appris.

This preliminary analysis suggests that a large proportion of coding nsSNV is positioned in functional domains and in secondary structural regions, both in COSMIC and in 1000 Genomes Project (1000G). In addition, we observe an enrichment of features like VARIANT (sequence variations), MOD\_RES (posttranslationally modified residue), and DNA\_BIND (binding site residues to DNA) at protein-protein interfaces in COSMIC in comparison with 1000G. Notice that features with a low percentage of nsSNV produce a less reliable result.
